# Supplementary material for: Highly efficient oxidation of ethyl lactate to ethyl pyruvate with molecular oxygen over VxOy/SBA-15 catalysts
Source: Royal Society of Chemistry journal article supplement (doi:10.1039/d3cy00476g), 2023-01-01
Supplement: d3cy00476g1.pdf [file d3cy00476g1.pdf]

## Supporting Information

# Highly efficient oxidation of ethyl lactate to ethyl pyruvate with molecular oxygen over $V_xO_y$ /SBA-15 catalyst

Jing Xu, Zonghui Liu\*, Yali Zhou, Rui Fu, Zhe Wen, Bing Yan, Bing Xue\*

*Jiangsu Key Laboratory of Advanced Catalytic Materials and Technology, School of Petrochemical Engineering, Changzhou University, Changzhou 213164, Jiangsu, China*

\* Corresponding author E-mail: [liuzh@cczu.edu.cn](mailto:liuzh@cczu.edu.cn); [xuebing@cczu.edu.cn](mailto:xuebing@cczu.edu.cn);

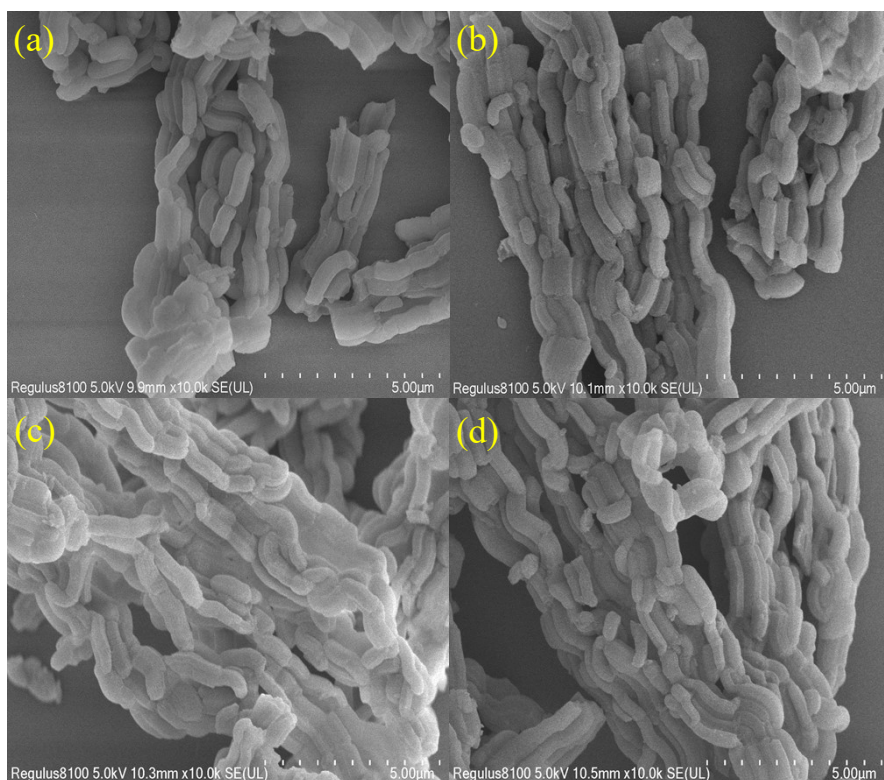

**Figure S1.** SEM image of SBA-15 (a),  $0.5V_xO_y/SBA-15$  (b),  $2.7V_xO_y/SBA-15$  (c),  $5.9V_xO_y/SBA-15$  (d)

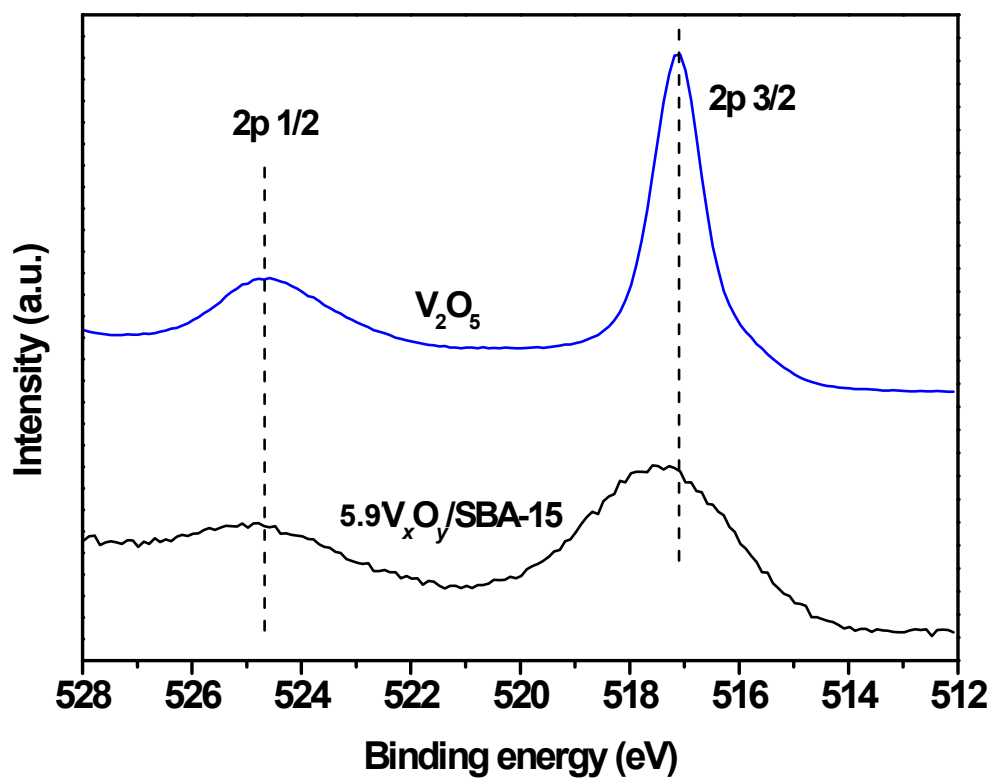

**Figure S2.** V 2p spectra of  $V_2O_5$  and  $5.9V_xO_y/SBA-15$

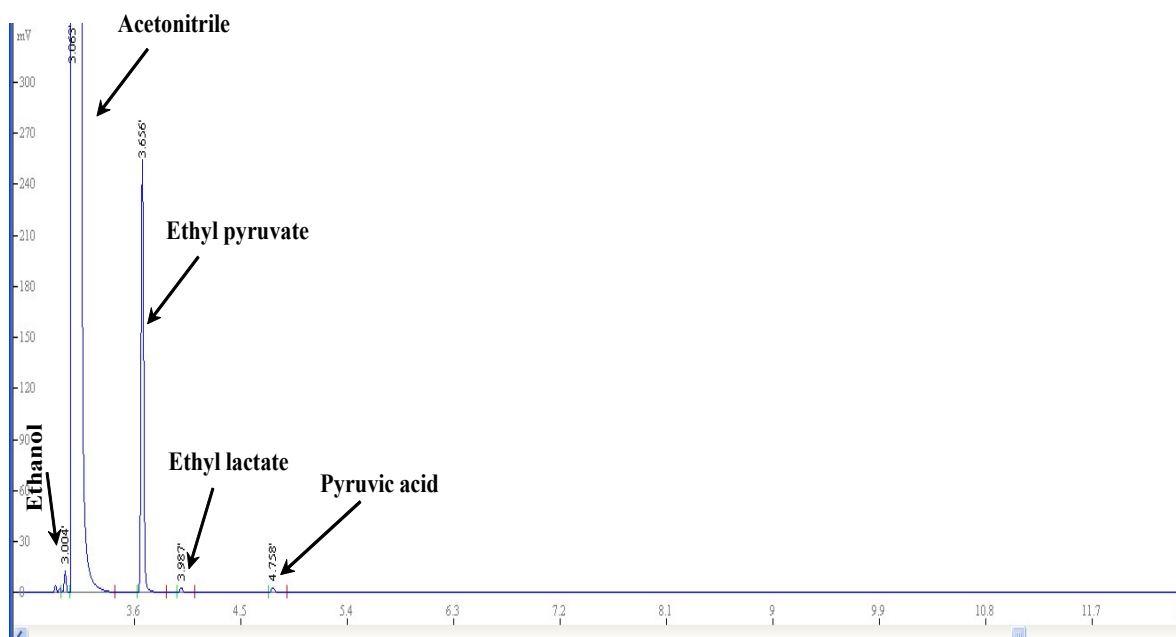

Figure S3. The GC-FID spectra of the EL conversion over  $5.9V_xO_y/SBA-15$  catalyst.

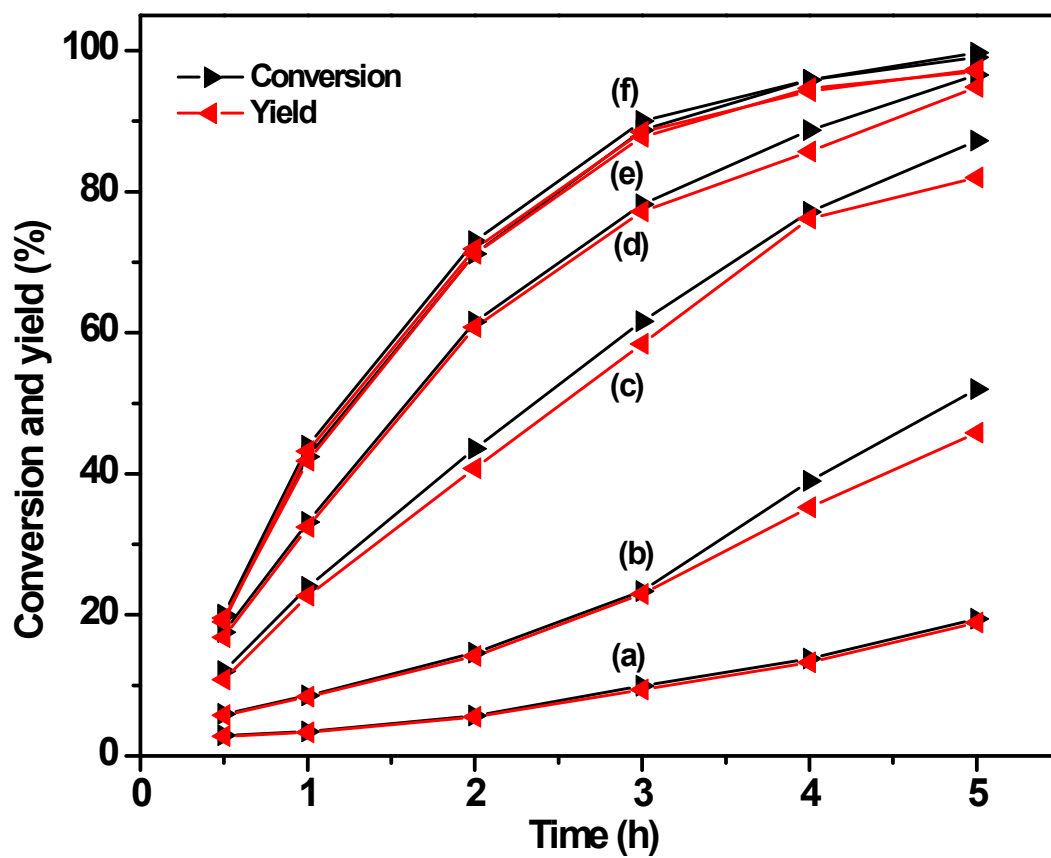

Figure S4. Time effect of  $0.5SBA-15$  (a),  $0.9V_xO_y/SBA-15$  (b),  $2.7V_xO_y/SBA-15$  (c),  $4.5V_xO_y/SBA-15$  (d),  $5.9V_xO_y/SBA-15$  (e),  $6.9V_xO_y/SBA-15$  (f) on EL reaction.

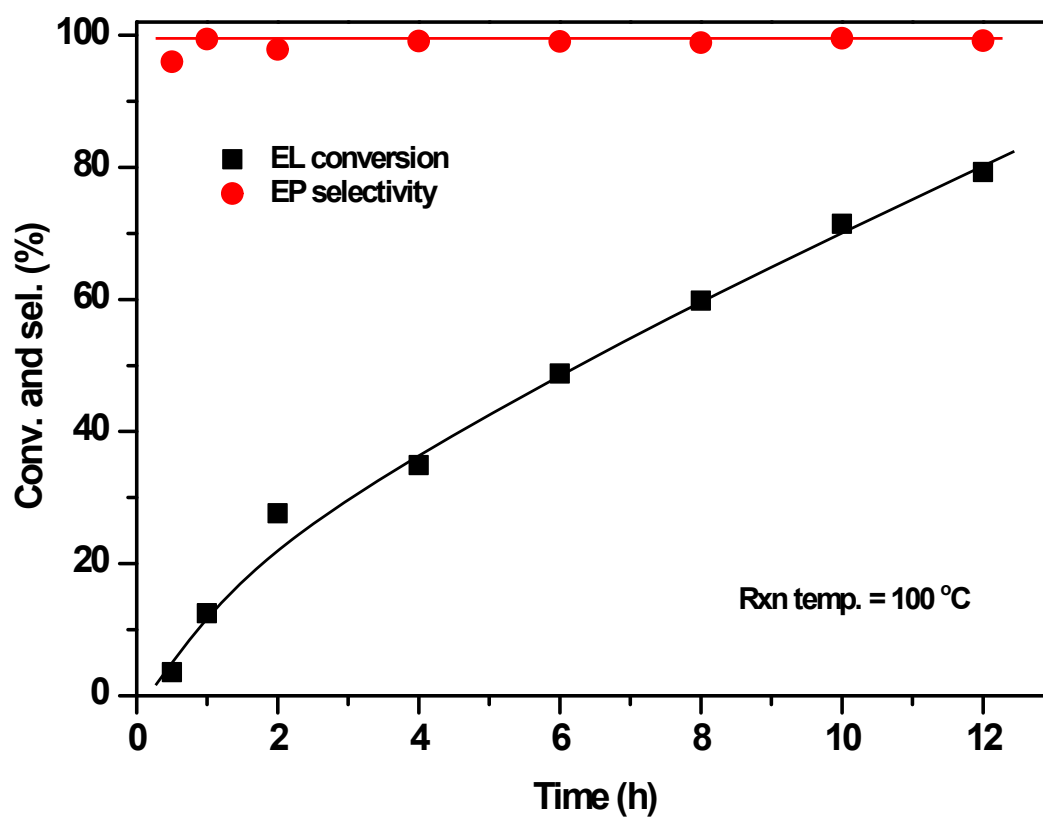

**Figure S5.** First-order kinetic fit (A) and Arrhenius plot of conversion of EL over  $5.9V_xO_y/SBA-15$  (B)

**Table S1.** The effect of  $H_2O_2$  or HBHP on catalytic performance of  $5.9V_xO_y/SBA-15$  catalyst.

| Oxygen donor | EL conversion (%) | EP selectivity (%) | EP yield (%) |
|--------------|-------------------|--------------------|--------------|
| $H_2O_2$     | 28                | 94                 | 23           |
| TBHP         | 52                | 93                 | 48           |

Reaction conditions: 2 mmol EL, 15 mL acetonitrile, 50 mg catalyst, EL: Oxygen donor = 1:2,  $T = 130\text{ }^\circ\text{C}$ ,  $t = 4\text{ h}$ .

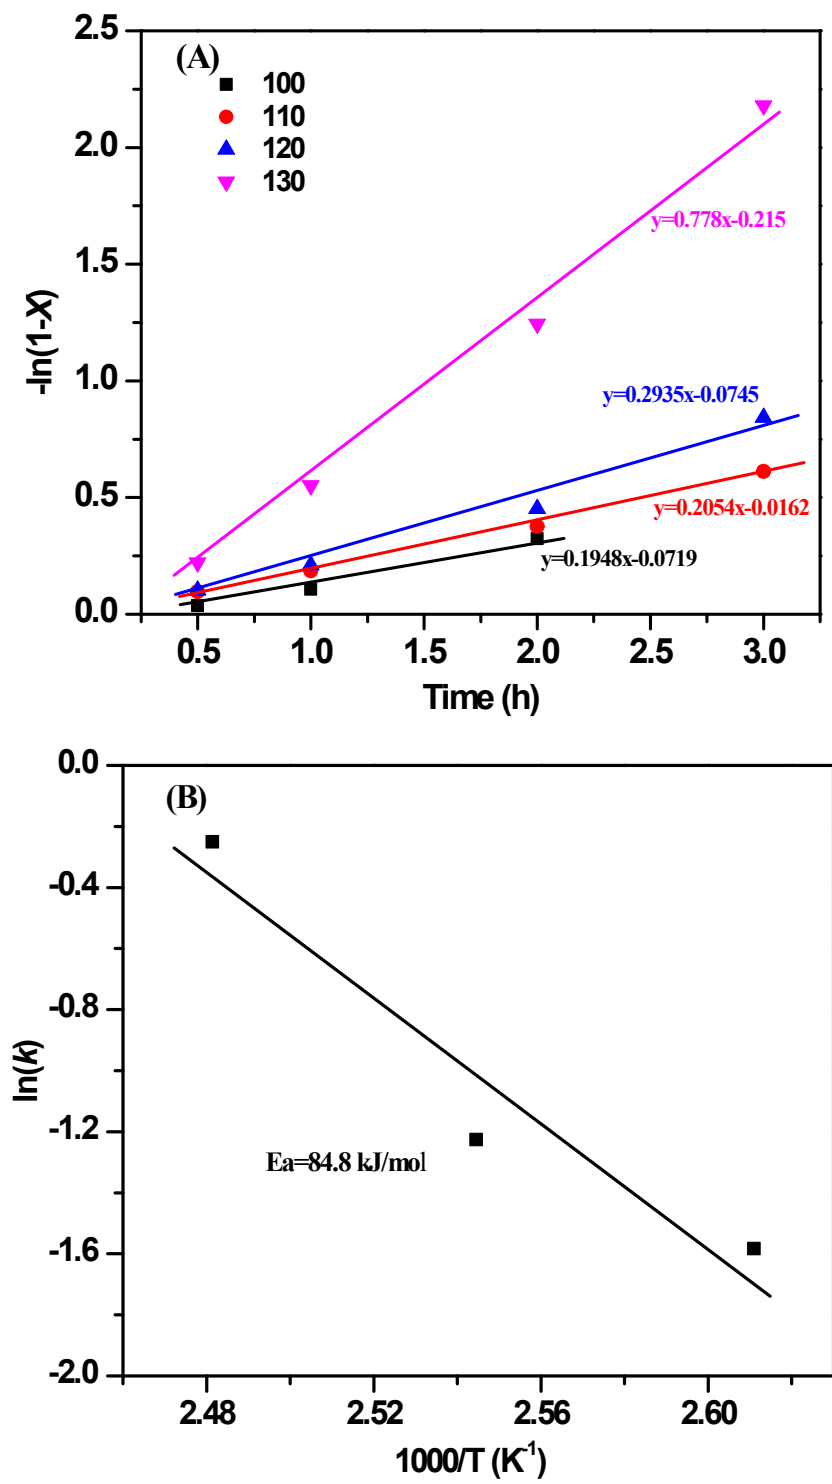

**Figure S6.** First-order kinetic fit (A) and Arrhenius plot of conversion of EL over 5.9V<sub>x</sub>O<sub>y</sub>/SBA-15 (B)
